# Supplementary material
Source: bioRxiv or medRxiv preprint supplement (https://medrxiv.org/highwire/filestream/90708/field_highwire_adjunct_files/1/2020.07.23.20160598-2.pdf)
Supplement: Supplementary file [file 2020.07.23.20160598-2.pdf]

**Supplementary Table 1.** Demographics and primary diagnoses for the individual patients with single-organ affections shown in Figure 2.

| Organ                 | Patient | Reason to seek medical help | Age | Sex | Primary diagnosis                                               |
|-----------------------|---------|-----------------------------|-----|-----|-----------------------------------------------------------------|
| Heart                 | 1       | Chest pain                  | 72  | W   | Unstable angina                                                 |
|                       | 2       | Chest pain                  | 80  | W   | Unstable angina                                                 |
|                       | 3       | Chest pain                  | 27  | M   | Rheumatic disorders of both mitral and aortic valves            |
|                       | 4       | Chest pain                  | 66  | M   | Unstable angina                                                 |
| Lungs                 | 5       | Dyspnea with cough          | 64  | W   | Other disorders of lung                                         |
|                       | 6       | Dyspnea                     | 77  | W   | Chronic obstructive pulmonary disease with (acute) exacerbation |
|                       | 7       | Dyspnea                     | 42  | W   | Acute bronchitis                                                |
|                       | 8       | Chest pain                  | 76  | M   | Chronic obstructive pulmonary disease with (acute) exacerbation |
| Stomach               | 9       | Abdominal pain              | 60  | W   | Acute gastritis                                                 |
|                       | 10      | Abdominal pain              | 48  | W   | Unspecified chronic gastritis                                   |
|                       | 11      | Abdominal pain              | 33  | M   | Acute gastritis                                                 |
|                       | 12      | Abdominal pain              | 46  | W   | Gastro-esophageal reflux disease without esophagitis            |
| Liver/<br>Gallbladder | 13      | Abdominal pain              | 30  | W   | Calculus of gallbladder without cholecystitis                   |
|                       | 14      | Chronic diarrhea            | 66  | W   | Malignant neoplasm of thyroid gland                             |
|                       | 15      | Elevated liver values       | 53  | M   | Inflammatory liver disease, unspecified                         |
|                       | 16      | Abdominal pain              | 43  | W   | Calculus of gallbladder with acute cholecystitis                |
| Kidneys/<br>Ureters   | 17      | Fever                       | 26  | M   | Urinary tract infection with unspecified site                   |
|                       | 18      | Abdominal pain              | 39  | M   | Unspecified renal colic                                         |
|                       | 19      | Abdominal pain              | 63  | M   | Unspecified renal colic                                         |
